# Supplementary material for: Mesenchymal Stem Cell-Secreted Exosome Promotes Chemoresistance in Breast Cancer via Enhancing miR-21-5p-Mediated S100A6 Expression
Source: PubMed Central journal article supplement — Mol Ther Oncolytics. 2020 Oct 20;19:283–93. doi: 10.1016/j.omto.2020.10.008 (PMC7689030; doi:10.1016/j.omto.2020.10.008), 2020-10-20
Supplement: mmc1.pdf [file mmc1.pdf]

OMTO, Volume 19

## Supplemental Information

### **Mesenchymal Stem Cell-Secreted Exosome Promotes Chemoresistance in Breast Cancer via Enhancing miR-21-5p-Mediated *S100A6* Expression**

**Tao Luo, Qiaoyuan Liu, Aihua Tan, Lixia Duan, Yuxian Jia, Li Nong, Jing Tang, Wenxian Zhou, Weimin Xie, Yongkui Lu, Qiang Yu, and Yan Liu**

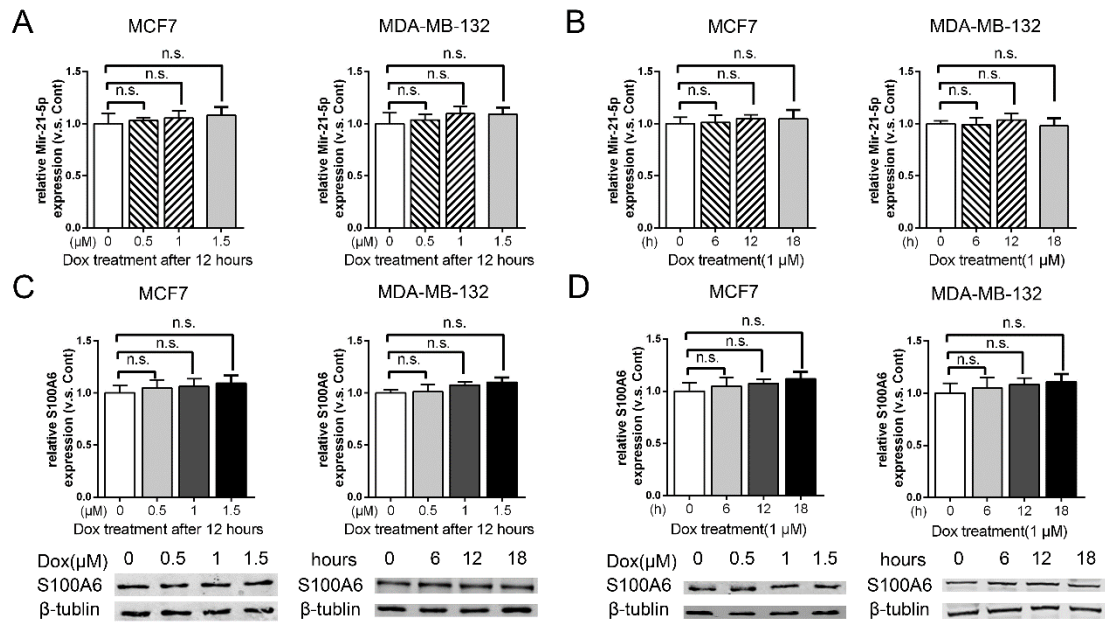

Figure S1

## FIGURE LEGENDS

### Figure S1. No significant effect on the enhancement of miR-21-5p and S100A6 by Dox treatment

in BCs. The expression of miR-21-5p in MDA-MB-231 cells and MCF-7 cells after treatment with Dox in the presence of different concentrations for 12 h (A) and in a time-dependent manner with 1  $\mu\text{M}$  of Dox (B). The mRNA and protein expression of S100A6 in MDA-MB-231 cells and MCF-7 cells after treatment with Dox in the presence of different concentrations for 12 h (C) and in a time-dependent manner with 1  $\mu\text{M}$  of Dox (D).
